# Supplementary material for: Spin coherence and magnetization dynamics of TMA2[KCo1−xFex(CN)6] toward coordination-framework spin qubits
Source: Royal Society of Chemistry journal article supplement (doi:10.1039/d4cp02263g), 2024-01-01
Supplement: d4cp02263g1.pdf [file d4cp02263g1.pdf]

## Supporting Information for

# Spin Coherence and Magnetization Dynamics of $\text{TMA}_2[\text{KCo}_{1-x}\text{Fe}_x(\text{CN})_6]$ toward Coordination-Framework Spin Qubits

Shraddha Gupta,<sup>a,b\*</sup> Masanori Wakizaka,<sup>c\*</sup> Takeshi Yamane,<sup>d</sup> Kazunobu Sato,<sup>d\*</sup> Ryuta Ishikawa,<sup>e</sup> Nobuto Funakoshi,<sup>b</sup> and Masahiro Yamashita<sup>a,b\*</sup>

<sup>a</sup> School of Chemical Science and Engineering, Tongji University, Siping Road 1239, Shanghai 200092, P, R, China

<sup>b</sup> Department of Chemistry, Graduate School of Science, Tohoku University, 6-3 Aramaki-Aza-Aoba, Aoba-Ku, Sendai 980-8578, Japan.

<sup>c</sup> Department of Applied Chemistry and Bioscience, Faculty of Science and Technology, Chitose Institute of Science and Technology, 758-65 Bibi, Chitose 066-8655, Japan.

<sup>d</sup> Department of Chemistry, Graduate School of Science, Osaka Metropolitan University, 3-3-138 Sugimoto, Sumiyoshi-Ku, Osaka 558-8585, Japan.

<sup>e</sup> Department of Chemistry, Faculty of Science, Fukuoka University, Nanakuma 8-19-1, Fukuoka 814-0180, Japan.

E-mail: [shraddha.gupta.q7@alumni.tohoku.ac.jp](mailto:shraddha.gupta.q7@alumni.tohoku.ac.jp), [ma-wakiz@photon.chitose.ac.jp](mailto:ma-wakiz@photon.chitose.ac.jp),  
[sato@omu.ac.jp](mailto:sato@omu.ac.jp), [masahiro.yamashita.c5@tohoku.ac.jp](mailto:masahiro.yamashita.c5@tohoku.ac.jp)

## Contents

- 1 **Figure S1.**  $\chi_m-T$  plot of Fe(III) coordination-framework.
- 2 **Figure S2.** Temperature dependence of  $M-H$  curves, a) Fe (2%) / Co coordination-framework, b) Fe (100%) coordination-framework.
- 3 **Figure S3.** Temperature dependence of powder-pattern EPR spectra of  $\text{TMA}_2[\text{KCo}_{0.98}\text{Fe}_{0.02}(\text{CN})_6]$
- 4 **Figure S4-S5.** AC susceptibility of  $\text{TMA}_2[\text{KCo}_{0.98}\text{Fe}_{0.02}(\text{CN})_6]$  under 0.1 T
- 5 **Figure S6-S7.** AC susceptibility of  $\text{TMA}_2[\text{KFe}(\text{CN})_6]$  under 0.1 T
- 6 **Table S1.** AC susceptibility fitting parameters of  $\text{TMA}_2[\text{KCo}_{0.98}\text{Fe}_{0.02}(\text{CN})_6]$  under 0.1 T
- 7 **Table S2.** AC susceptibility fitting parameters of  $\text{TMA}_2[\text{KFe}(\text{CN})_6]$  under 0.1 T
- 8 **Table S3.** Magnetic relaxation fitting parameters under 0.1 T
- 9 **Table S4.** Mossbauer fitting parameter
- 10 **Figure S8.** Echo-detected field-swept ESR of  $\text{TMA}_2[\text{KCo}_{1-x}\text{Fe}_x(\text{CN})_6]$
- 11 **Figure S9.**  $\tau$  dependent Echo-detected field-swept ESR of  $\text{TMA}_2[\text{KCo}_{0.999}\text{Fe}_{0.001}(\text{CN})_6]$
- 12 **Figure S10.** Field dependent two-pulse ESEEM of  $\text{TMA}_2[\text{KCo}_{0.999}\text{Fe}_{0.001}(\text{CN})_6]$
- 13 **Figure S11.** Temperature dependence of powder-pattern EPR spectra of  $\text{TMA}_2[\text{KCo}_{0.999}\text{Fe}_{0.001}(\text{CN})_6]$
- 14 **Figure S12.** Inversion recovery time ( $T_1$ ) and Hahn-echo decay time ( $T_2$ ) of  $\text{TMA}_2[\text{KCo}_{1-x}\text{Fe}_x(\text{CN})_6]$  ( $x= 0.02, 0.001$ )
- 15 **Figure S13.** Hahn-echo decay plots of  $\text{TMA}_2[\text{KCo}_{0.98}\text{Fe}_{0.02}(\text{CN})_6]$ ,  $\text{TMA}_2[\text{KCo}_{0.995}\text{Fe}_{0.005}(\text{CN})_6]$  and  $\text{TMA}_2[\text{KCo}_{0.999}\text{Fe}_{0.001}(\text{CN})_6]$ .
- 16 **Figure S14.** Temperature dependence of the  $T_1$  and  $T_2$  relaxation times
- 17 **Table S5.** Fitting parameters of  $\text{TMA}_2[\text{KCo}_{0.98}\text{Fe}_{0.02}(\text{CN})_6]$  for inversion recovery
- 18 **Table S6.** Fitting parameters of  $\text{TMA}_2[\text{KCo}_{0.98}\text{Fe}_{0.02}(\text{CN})_6]$  for Hahn-echo decay
- 19 **Table S7.** Fitting parameters of  $\text{TMA}_2[\text{KCo}_{0.995}\text{Fe}_{0.005}(\text{CN})_6]$  for inversion recovery
- 20 **Table S8.** Fitting parameters of  $\text{TMA}_2[\text{KCo}_{0.995}\text{Fe}_{0.005}(\text{CN})_6]$  for Hahn-echo decay
- 21 **Table S9.** Fitting parameters of  $\text{TMA}_2[\text{KCo}_{0.999}\text{Fe}_{0.001}(\text{CN})_6]$  for inversion recovery
- 22 **Table S10.** Fitting parameters of  $\text{TMA}_2[\text{KCo}_{0.999}\text{Fe}_{0.001}(\text{CN})_6]$  for Hahn-echo decay
- 23 **Figure S15:** Transient Electron Spin Nutation of  $\text{TMA}_2[\text{KCo}_{0.98}\text{Fe}_{0.02}(\text{CN})_6]$  at 4 and 13 K

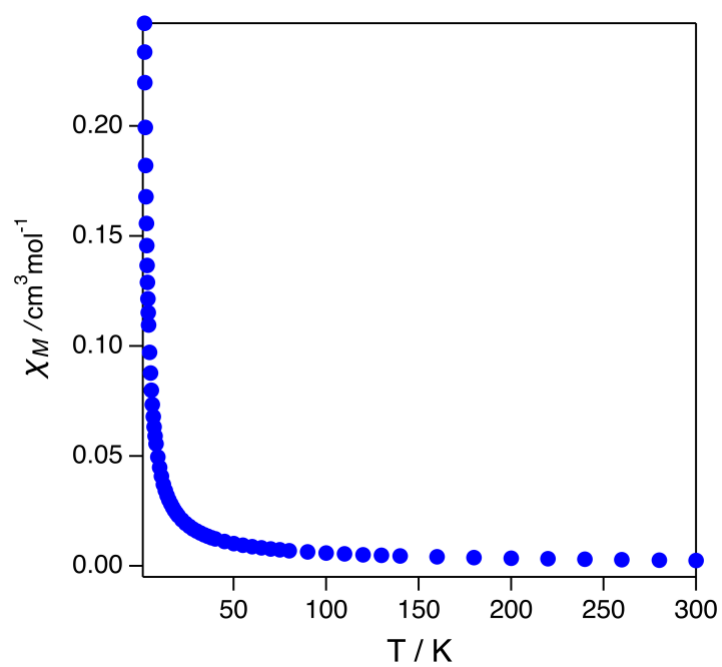

**Figure S1:**  $\chi_m$ - $T$  plot of  $(\text{TMA})_2[\text{KFe}(\text{CN})_6]$ .

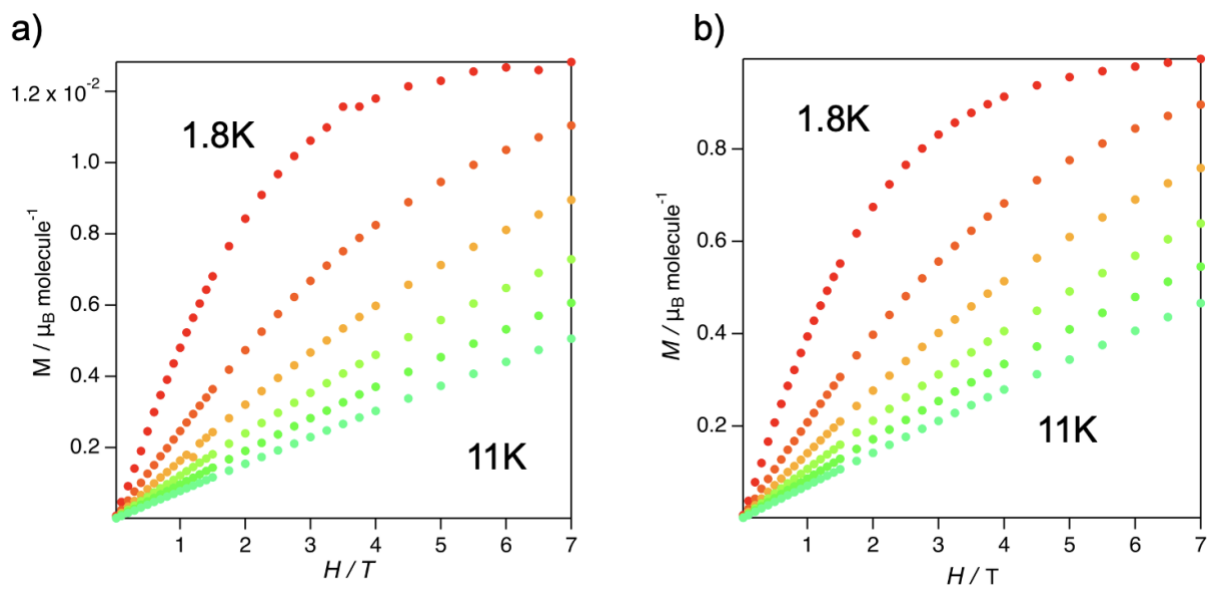

**Figure S2 :** Temperature dependence of  $M$ - $H$  curves, a) Fe (2%) / Co coordination-framework, b) Fe (100%) coordination-framework.

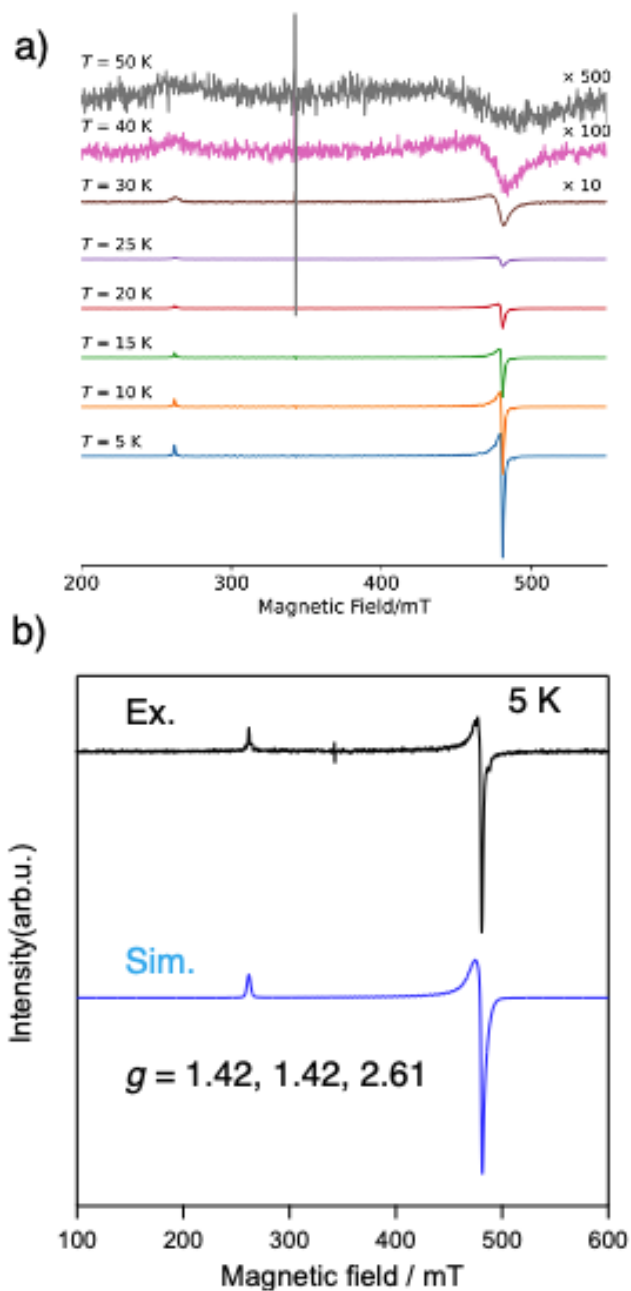

**Figure S3:** a) Temperature dependence of powder-pattern EPR spectra of  $\text{TMA}_2[\text{KC}_{0.98}\text{Fe}_{0.02}(\text{CN})_6]$  [MW freq.: 9.54634 GHz, MW power: 0.02 mW]. b) Comparison with the simulated one using EasySpin:  $g = 1.418, 1.419, \text{ and } 2.606$ ;  $g_{\text{Strain}} = 0, 0.04, \text{ and } 0.03$ ;  $lwpp = 0.8$  (Gaussian) and 0.8 (Lorentzian).

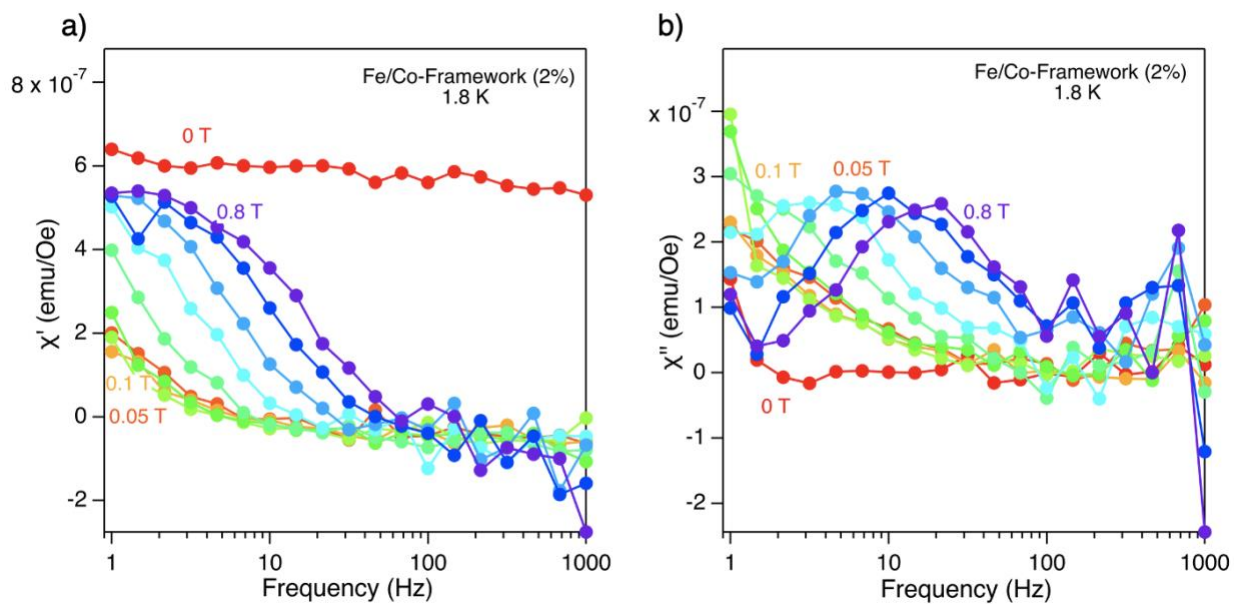

**Figure S4.** (a) The real part ( $\chi'$ ) and (b) the imaginary part ( $\chi''$ ) of AC susceptibility of  $\text{TMA}_2[\text{KCo}_{0.98}\text{Fe}_{0.02}(\text{CN})_6]$ , measured at 1.8 K under magnetic field of 0, 0.05, 0.1, 0.2, 0.3, 0.4, 0.5, 0.6, 0.7, 0.8 T. AC drive is 2.5 Oe.

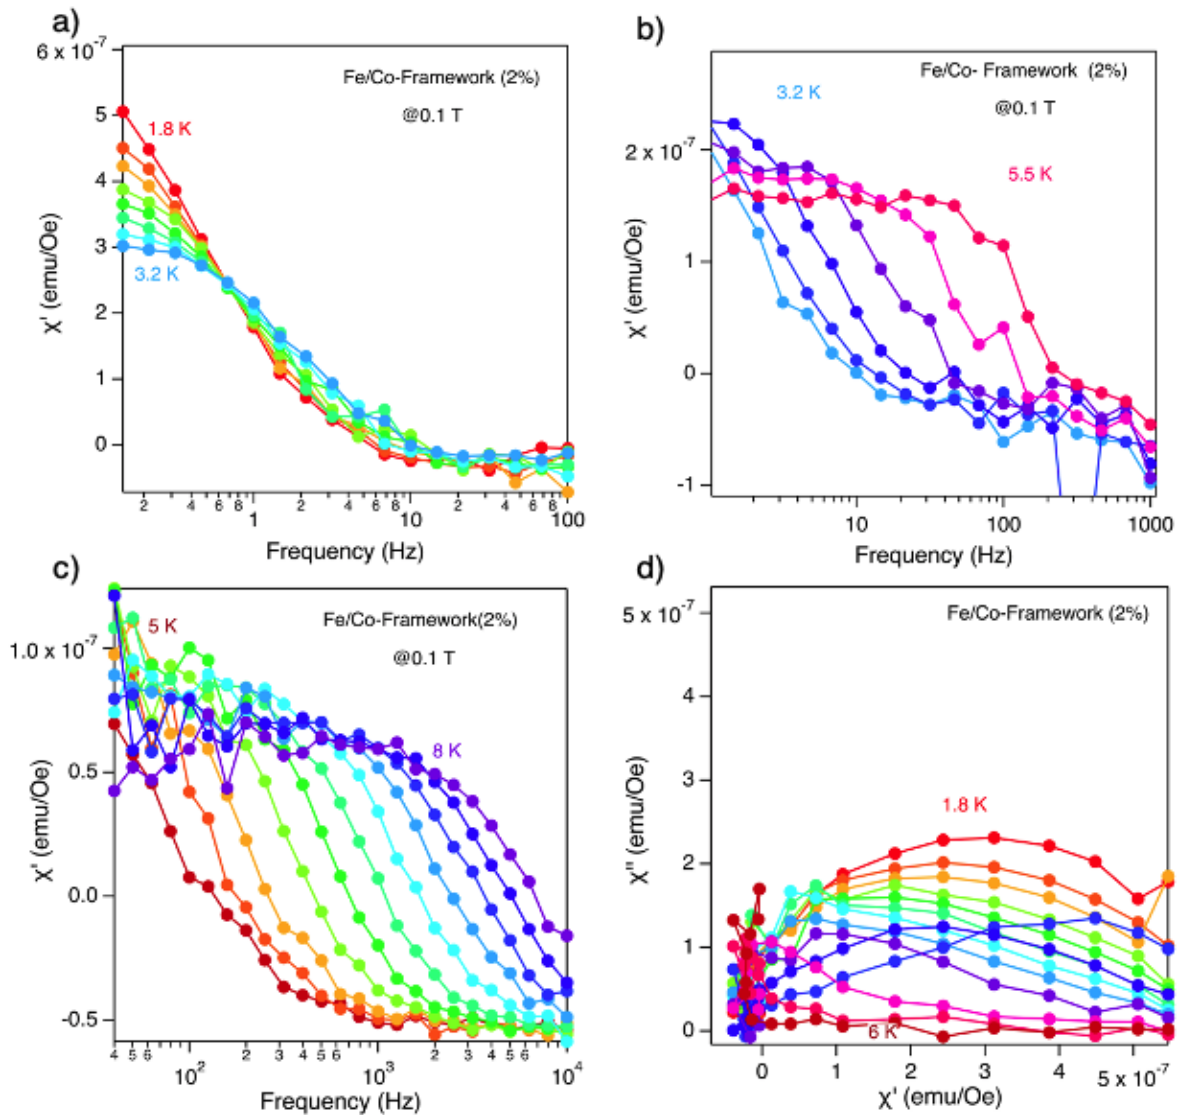

**Figure S5.** a-c) The real part of the AC susceptibility ( $\chi'$ ) of  $\text{TMA}_2[\text{KC}_{0.98}\text{Fe}_{0.02}(\text{CN})_6]$ , measured at 1.8, 2, 2.2, 2.4, 2.6, 2.8, 3, 3.2, 3.5, 4, 4.5, 5, 5.3, 5.6, 5.9, 6.2, 6.5, 6.8, 7.1, 7.4, 7.7, 8K over a range of 0.1–1000 Hz under a static magnetic field of 0.1 T. d) the Cole-Cole plot.

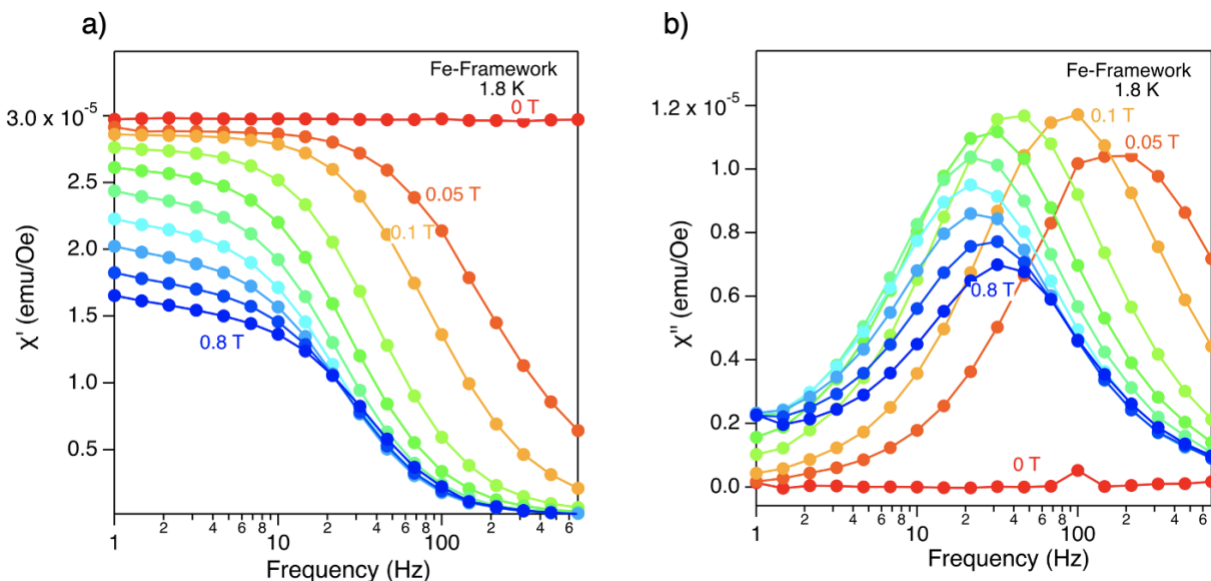

**Figure S6.** (a) The real part ( $\chi'$ ) and (b) the imaginary part ( $\chi''$ ) of AC susceptibility of TMA<sub>2</sub>[KFe(CN)<sub>6</sub>], measured at 1.8 K under magnetic field of 0, 0.05, 0.1, 0.2, 0.3, 0.4, 0.5, 0.6, 0.7, 0.8 T. AC drive is 2.5 Oe.

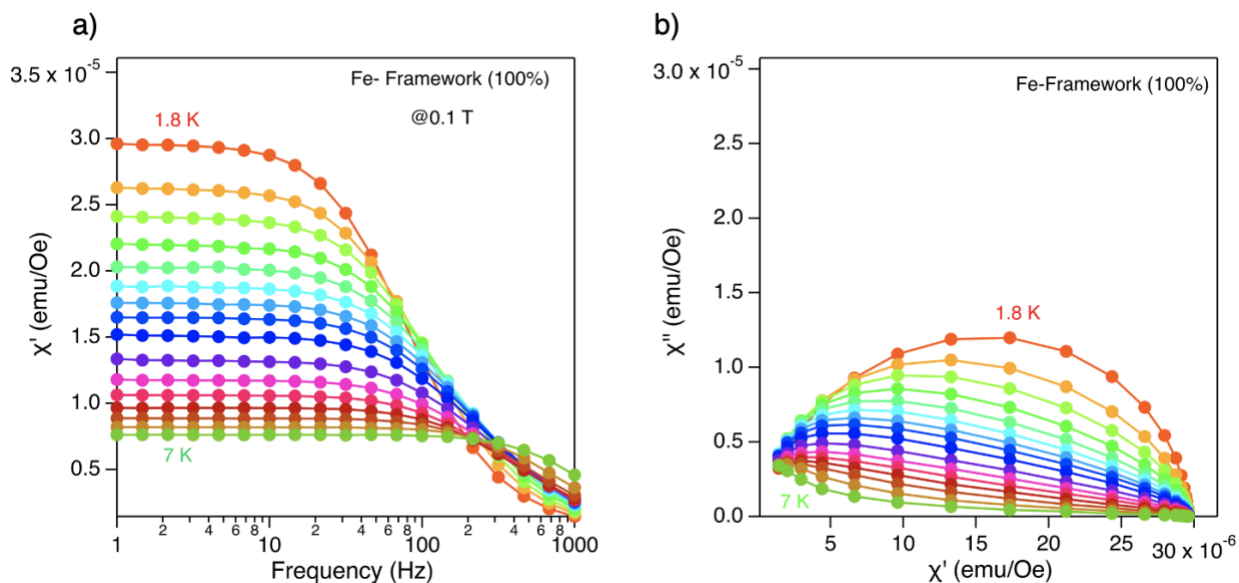

**Figure S7.** a) The real part of the AC susceptibility ( $\chi'$ ) of TMA<sub>2</sub>[KFe(CN)<sub>6</sub>], measured at 1.8, 2, 2.2, 2.4, 2.6, 2.8, 3, 3.2, 3.5, 4, 4.5, 5, 5.3, 5.6, 5.9, 6.2, 6.5, 6.8, 7.1, 7.4, 7.7, 8 K over a range of 0.1–1000 Hz under a static magnetic field of 0.1 T. b) the Cole-Cole plot.

**Table S1.** Summary of AC susceptibility fitting parameters of Fe-Framework (100 %) under 0.1 T

| $T$<br>[K] | $\chi_T - \chi_S$<br>[emu Oe <sup>-1</sup> ] | $\tau$<br>[s] | $\alpha$ | $\sigma \chi_T - \chi_S$<br>[emu Oe <sup>-1</sup> ] | $\sigma \tau$<br>[s] | $\sigma \alpha$ |
|------------|----------------------------------------------|---------------|----------|-----------------------------------------------------|----------------------|-----------------|
| 1.8        | 2.93E-05                                     | 0.0018854     | 0.11625  | 2.25E-07                                            | 2.29E-05             | 6.39E-03        |
| 2          | 2.61E-05                                     | 0.001435      | 0.12964  | 1.86E-07                                            | 1.64E-05             | 5.96E-03        |
| 2.2        | 2.40E-05                                     | 0.0011965     | 0.14046  | 1.91E-07                                            | 1.53E-05             | 6.61E-03        |
| 2.4        | 2.20E-05                                     | 0.0010064     | 0.14908  | 2.10E-07                                            | 1.55E-05             | 7.90E-03        |
| 2.6        | 2.02E-05                                     | 0.00087961    | 0.15348  | 2.11E-07                                            | 1.48E-05             | 8.57E-03        |
| 2.8        | 1.89E-05                                     | 0.00078162    | 0.16425  | 2.00E-07                                            | 1.35E-05             | 8.60E-03        |
| 3          | 1.76E-05                                     | 0.00071368    | 0.16565  | 2.01E-07                                            | 1.33E-05             | 9.25E-03        |
| 3.2        | 1.66E-05                                     | 0.00065291    | 0.17182  | 2.04E-07                                            | 1.32E-05             | 9.81E-03        |
| 3.5        | 1.51E-05                                     | 0.00059007    | 0.17421  | 2.00E-07                                            | 1.29E-05             | 1.05E-02        |
| 4          | 1.32E-05                                     | 0.00051278    | 0.17273  | 1.96E-07                                            | 1.26E-05             | 1.15E-02        |
| 4.5        | 1.16E-05                                     | 0.00046259    | 0.16394  | 1.86E-07                                            | 1.21E-05             | 1.23E-02        |
| 5          | 5.62E-06                                     | 0.00032       | 0.21958  | 5.08E-08                                            | 5.07E-06             | 0.00738         |
| 5.3        | 5.288E-06                                    | 0.00030042    | 0.20734  | 4.84E-08                                            | 0.00000469           | 0.00751         |
| 5.6        | 4.985E-06                                    | 0.00027358    | 0.19208  | 4.54E-08                                            | 0.00000419           | 0.00753         |
| 5.9        | 4.686E-06                                    | 0.00024102    | 0.17074  | 3.9E-08                                             | 0.0000033            | 0.00693         |
| 6.2        | 4.412E-06                                    | 0.00020615    | 0.14546  | 3.72E-08                                            | 0.00000278           | 0.00707         |
| 6.5        | 4.161E-06                                    | 0.00016986    | 0.11755  | 3.38E-08                                            | 0.00000213           | 0.00687         |
| 6.8        | 3.954E-06                                    | 0.000136      | 0.094842 | 2.58E-08                                            | 0.00000132           | 0.00556         |
| 7.1        | 3.757E-06                                    | 0.00010554    | 0.072787 | 2.1E-08                                             | 8.43E-07             | 0.00477         |
| 7.4        | 3.581E-06                                    | 8.0266E-05    | 0.055601 | 1.86E-08                                            | 5.75E-07             | 0.00445         |
| 7.7        | 3.425E-06                                    | 6.0166E-05    | 0.043698 | 1.54E-08                                            | 3.62E-07             | 0.00381         |
| 8          | 3.279E-06                                    | 4.4964E-05    | 0.034916 | 1.15E-08                                            | 2.07E-07             | 0.00289         |



**Table S2.** Summary of AC susceptibility fitting parameters of Fe/Co-Framework (2 %) under 0.1 T

| $T$<br>[K] | $\chi_T - \chi_S$<br>[emu Oe <sup>-1</sup> ] | $\tau$<br>[s] | $\alpha$ | $\sigma \chi_T - \chi_S$<br>[emu Oe <sup>-1</sup> ] | $\sigma \tau$<br>[s] | $\sigma \alpha$ |
|------------|----------------------------------------------|---------------|----------|-----------------------------------------------------|----------------------|-----------------|
| 1.8        | 6.89E-07                                     | 0.29854       | 0.24901  | 1.73E-08                                            | 0.0141               | 0.0184          |
| 2          | 6.01E-07                                     | 0.23492       | 0.2455   | 1.17E-08                                            | 0.0085               | 0.0148          |
| 2.2        | 5.81E-07                                     | 0.20561       | 0.29527  | 2.03E-08                                            | 0.0144               | 0.0256          |
| 2.4        | 5.29E-07                                     | 0.155572      | 0.27455  | 3.53E-08                                            | 0.02                 | 0.051           |
| 2.6        | 4.33E-07                                     | 0.1624        | 0.20491  | 2.61E-08                                            | 1.71E-02             | 0.0485          |
| 2.8        | 4.63E-07                                     | 0.09802       | 0.23083  | 2.25E-08                                            | 8.78E-03             | 0.0388          |
| 3          | 4.17E-07                                     | 0.085603      | 0.19209  | 1.60E-08                                            | 5.78E-03             | 0.0313          |
| 3.2        | 3.78E-07                                     | 0.075378      | 0.24267  | 1.56E-08                                            | 5.84E-03             | 0.0327          |
| 3.5        | 3.6697                                       | 0.063351      | 0.23     | 2.51E-08                                            | 0.0126               | 0               |
| 4          | 3.21E-07                                     | 0.022425      | 0.23     | 1.89E-08                                            | 0.00353              | 0               |
| 4.5        | 3.06E-07                                     | 0.0069103     | 0.23     | 2.10E-08                                            | 0.00122              | 0               |
| 5          | 2.23E-07                                     | 0.00265       | 0.13818  | 1.74E-08                                            | 0.00035              | 0.0468          |
| 5.3        | 1.87E-07                                     | 0.00134       | 0.0438   | 8.64E-09                                            | 8.26E-05             | 0.0383          |
| 5.6        | 1.7689E-07                                   | 0.00087251    | 0.065279 | 6.31E-09                                            | 0.0000432            | 0.0303          |
| 5.9        | 1.6457E-07                                   | 0.00047884    | 0.057434 | 1.04E-08                                            | 0.0000429            | 0.0541          |
| 6.2        | 1.6953E-07                                   | 0.00032861    | 0.096089 | 4.58E-09                                            | 0.0000133            | 0.0229          |
| 6.5        | 1.4908E-07                                   | 0.00018443    | 0.034432 | 5.38E-09                                            | 0.00000924           | 0.0309          |
| 6.8        | 1.7075E-07                                   | 0.00011484    | 0.19193  | 1.17E-08                                            | 0.0000132            | 0.0564          |
| 7.1        | 1.3542E-07                                   | 7.1725E-05    | 0        | 5.82E-09                                            | 0.00000554           | 0               |
| 7.4        | 1.2885E-07                                   | 5.0881E-05    | 0.01     | 5.25E-09                                            | 0.00000391           | 0               |
| 7.7        | 1.4188E-07                                   | 3.0755E-05    | 0.099802 | 1.26E-08                                            | 0.00000417           | 0.0629          |
| 8          | 1.2067E-07                                   | 0.00002562    | 0        | 5.94E-09                                            | 0.00000253           | 0               |

**Table S3.** Summary of magnetic relaxation fitting parameters under 0.1 T

| Sample                                                                          | $B$<br>[K s <sup>-1</sup> ] | $C$<br>[K <sup><math>m</math></sup> s <sup>-1</sup> ] | $m$  | $\sigma B$<br>[K s <sup>-1</sup> ] | $\sigma C$<br>[K <sup><math>m</math></sup> s <sup>-1</sup> ] | $\sigma m$ |
|---------------------------------------------------------------------------------|-----------------------------|-------------------------------------------------------|------|------------------------------------|--------------------------------------------------------------|------------|
| TMA <sub>2</sub> [KCo <sub>0.98</sub><br>Fe <sub>0.02</sub> (CN) <sub>6</sub> ] | 1.1698                      | 3769.9                                                | 8.94 | 0.16                               | 2.33e+3                                                      | 0.34       |

| Sample                                   | $A$<br>[K s <sup>-1</sup> ] | $C$<br>[K <sup><math>m</math></sup> s <sup>-1</sup> ] | $m$  | $\sigma A$<br>[K s <sup>-1</sup> ] | $\sigma C$<br>[K <sup><math>m</math></sup> s <sup>-1</sup> ] | $\sigma m$ |
|------------------------------------------|-----------------------------|-------------------------------------------------------|------|------------------------------------|--------------------------------------------------------------|------------|
| TMA <sub>2</sub> [KFe(CN) <sub>6</sub> ] | 0.0020                      | 4397.3                                                | 8.74 | 4.92e-05                           | 2.94e+03                                                     | 0.33       |

Standard deviation ( $\sigma$ )**Table S4.** MBS parameter

| Fe (%) | $d$ (mm/s) | $\Delta E_Q$ (mm/s) | FWHM (mm/s) |
|--------|------------|---------------------|-------------|
| 100    | -0.115(36) | 1.193(45)           | 1.730(69)   |
| 2      | 0.046      | 0.076               | 0.265       |

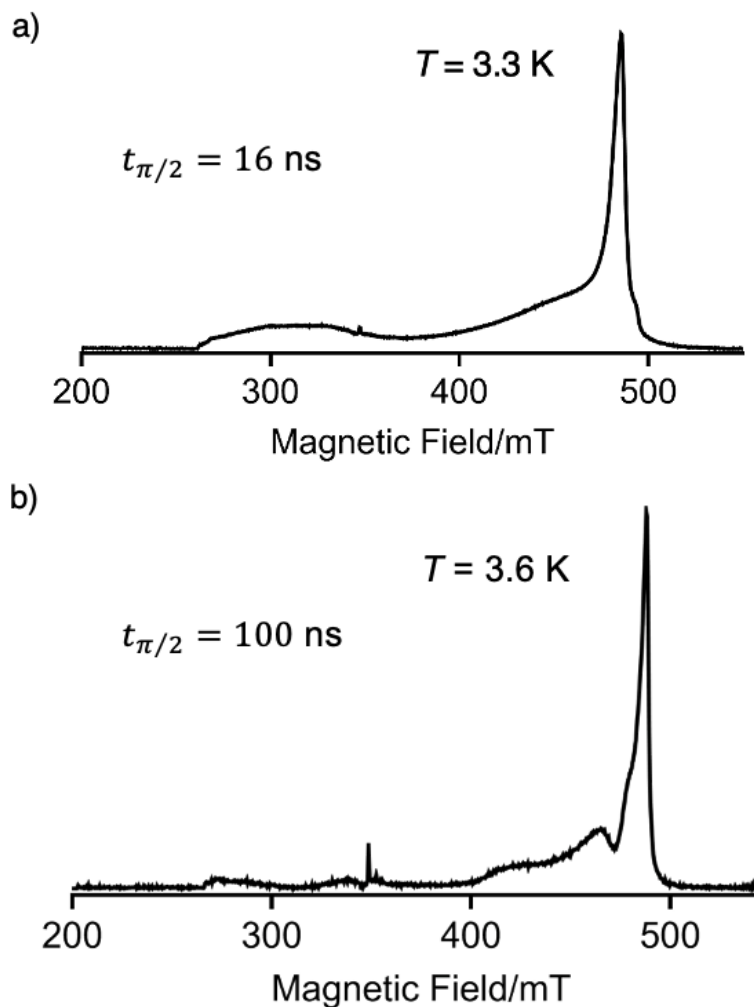

**Figure S8:** Echo-detected field-swept ESR of a)  $\text{TMA}_2[\text{KC}_{0.98}\text{Fe}_{0.02}(\text{CN})_6]$  and b)  $\text{TMA}_2[\text{KC}_{0.999}\text{Fe}_{0.001}(\text{CN})_6]$  as a function of magnetic field using the MW freq. of 9.68379 GHz for (a) and 9.72389 GHz for (b).

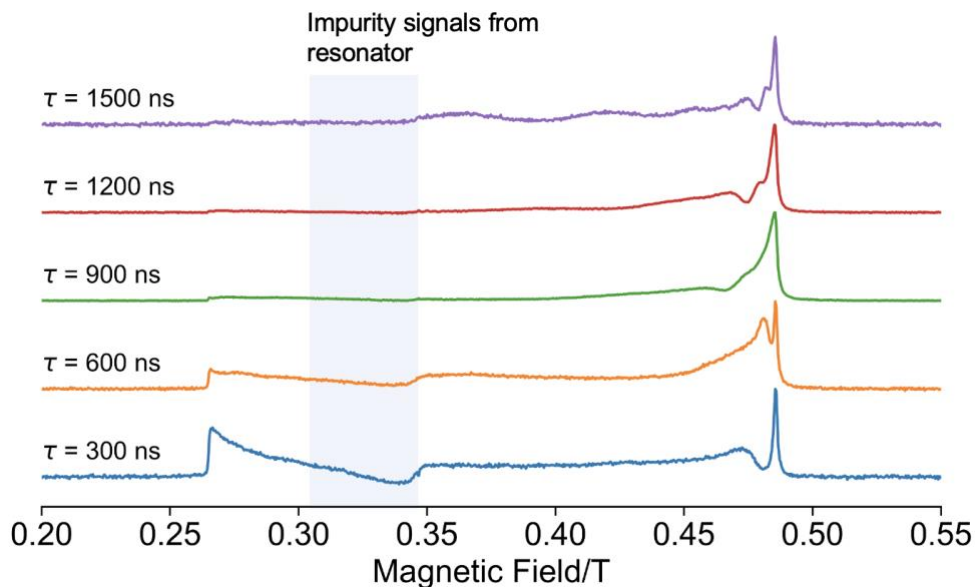

**Figure S9:**  $\tau$  dependent ESR spectra of  $\text{TMA}_2[\text{KCo}_{0.999}\text{Fe}_{0.001}(\text{CN})_6]$  observed by Hahn-echo detection as a function of magnetic field using the MW freq. of 9.669286 at  $T = 3.5$  K.

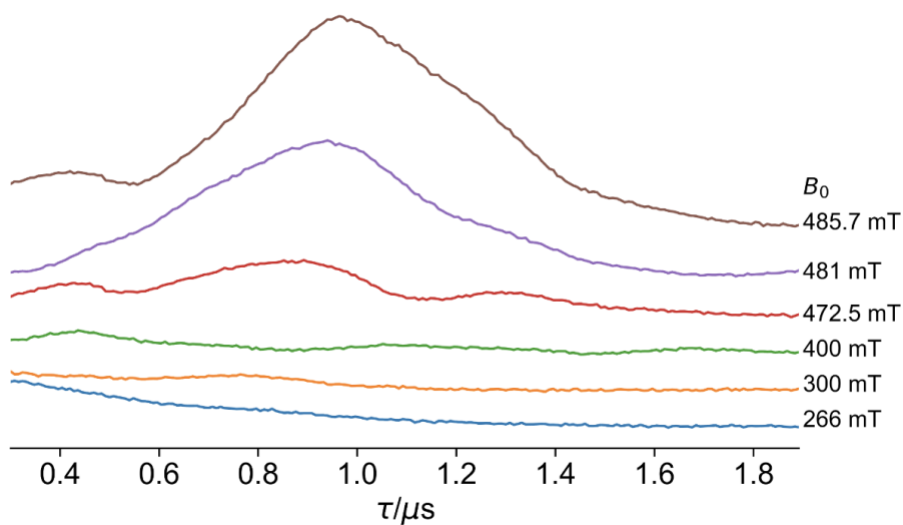

**Figure S10:** Field dependent two-pulse ESEEM of  $\text{TMA}_2[\text{KCo}_{0.999}\text{Fe}_{0.001}(\text{CN})_6]$  observed at 3.5 K.

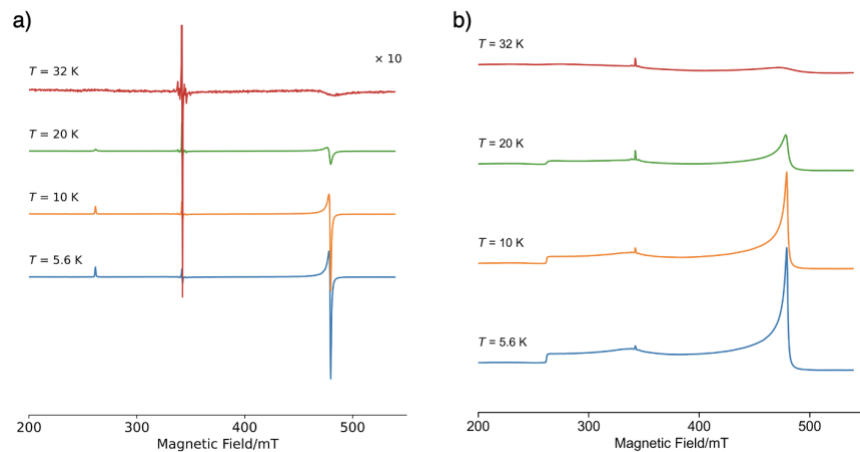

**Figure S11:** a) Temperature dependence of powder-pattern EPR spectra of  $\text{TMA}_2[\text{KCo}_{0.999}\text{Fe}_{0.001}(\text{CN})_6]$  [MW freq.: 9.669286 GHz]. b) Absorption forms of cw-ESR spectra.

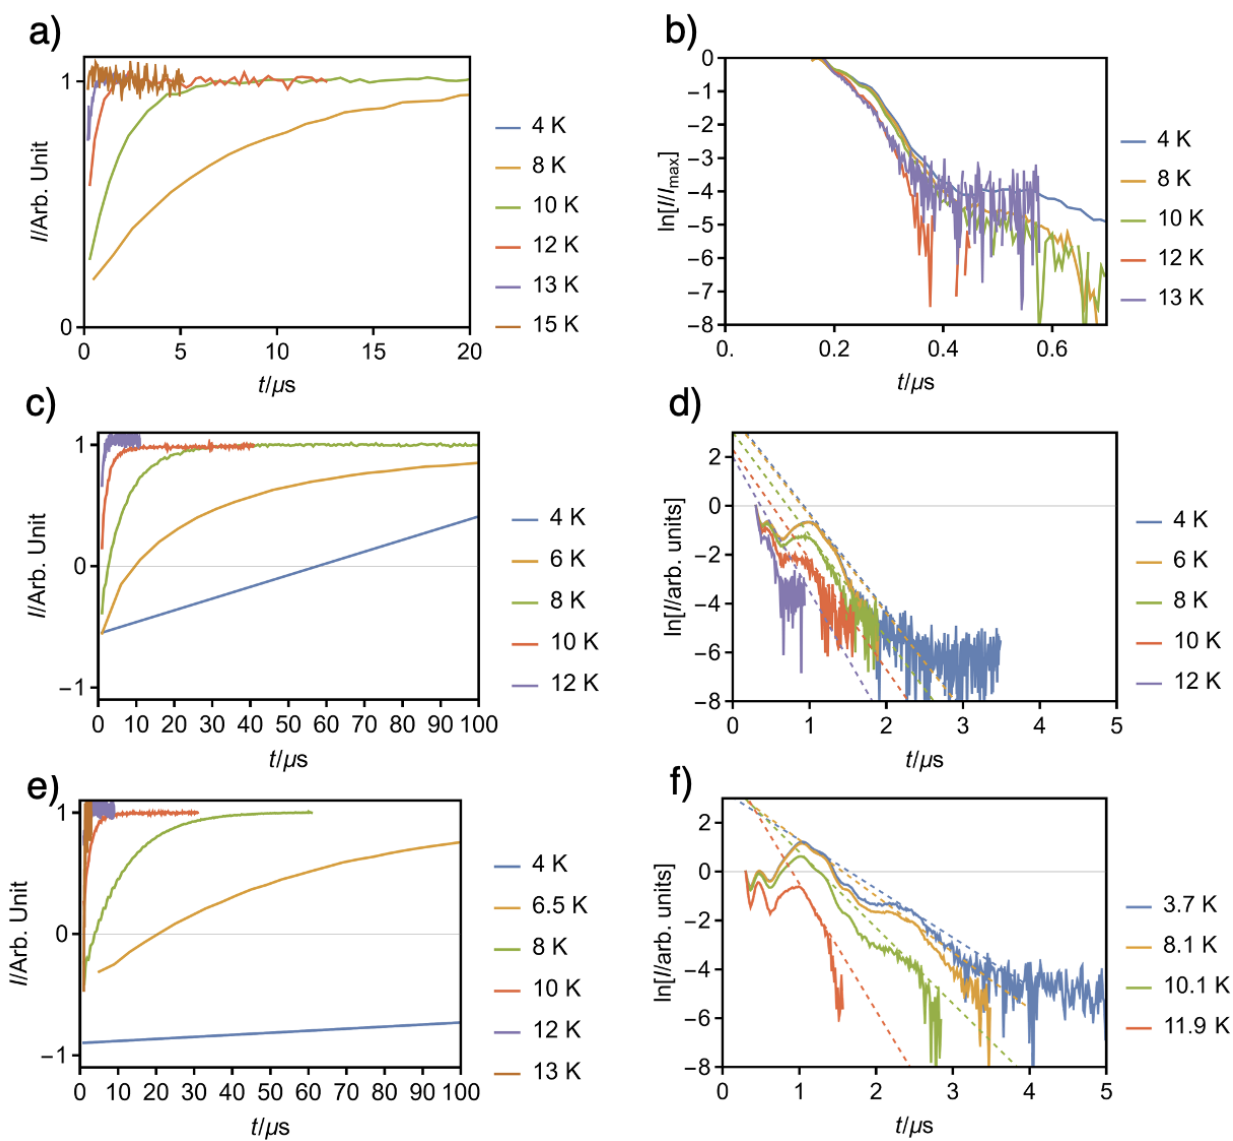

**Figure S12:** a,c,e) Inversion recovery time ( $T_1$ ) of  $\text{TMA}_2[\text{KCo}_{0.98}\text{Fe}_{0.02}(\text{CN})_6]$  and  $\text{TMA}_2[\text{KCo}_{0.995}\text{Fe}_{0.005}(\text{CN})_6]$  and  $\text{TMA}_2[\text{KCo}_{0.999}\text{Fe}_{0.001}(\text{CN})_6]$  under a magnetic field of 458.5 mT, 488.25 mT and 488.25 mT respectively. b,d,f) Hahn-echo decay time ( $T_2$ ) of  $\text{TMA}_2[\text{KCo}_{0.98}\text{Fe}_{0.02}(\text{CN})_6]$ ,  $\text{TMA}_2[\text{KCo}_{0.995}\text{Fe}_{0.005}(\text{CN})_6]$  and  $\text{TMA}_2[\text{KCo}_{0.999}\text{Fe}_{0.001}(\text{CN})_6]$ .

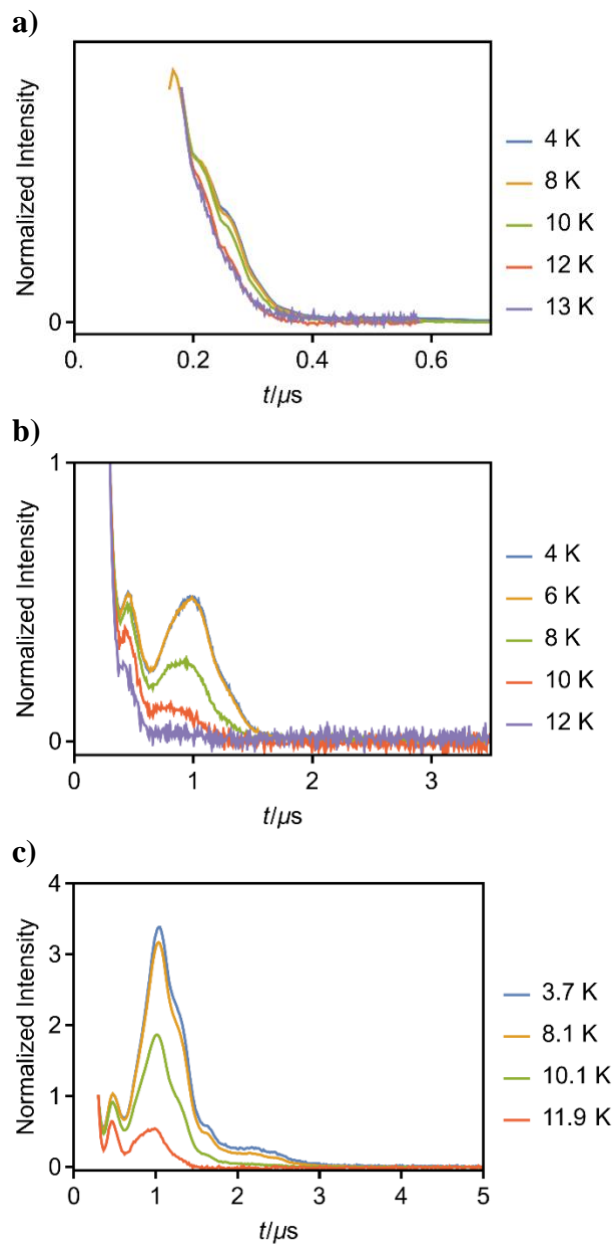

**Figure S13:** Hahn-echo decay plots of  $\text{TMA}_2[\text{KCo}_{0.98}\text{Fe}_{0.02}(\text{CN})_6]$  (a),  $\text{TMA}_2[\text{KCo}_{0.995}\text{Fe}_{0.005}(\text{CN})_6]$  (b) and  $\text{TMA}_2[\text{KCo}_{0.999}\text{Fe}_{0.001}(\text{CN})_6]$  (c). All the echo decays show drastic initial decays which are due to dephasing in the presence of cross-suppression effects. In (a), the cross-suppression effects dominate to the echo decay.

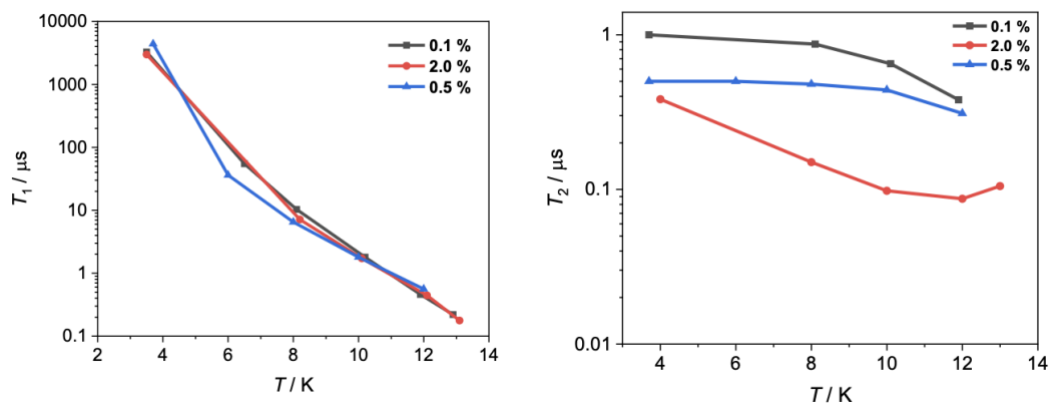

**Figure S14.** Temperature dependence of (a) the  $T_1$  and (b)  $T_2$  relaxation times of the Fe (0.1, 0.5 and 2 %)/Co coordination-framework.

**Table S5.** Summary of fitting parameters of  $\text{TMA}_2[\text{KC}_{0.98}\text{Fe}_{0.02}(\text{CN})_6]$  for inversion recovery

| $T / \text{K}$ | $T_1 / \mu\text{s}$ |
|----------------|---------------------|
| 3.4            | 2990                |
| 8.2            | 7.125               |
| 10.1           | 1.721               |
| 12.1           | 0.444               |
| 13.1           | 0.1777              |

**Table S6.** Summary of fitting parameters of  $\text{TMA}_2[\text{KC}_{0.98}\text{Fe}_{0.02}(\text{CN})_6]$  for Hahn echo-decay

| $T / \text{K}$ | $T_2 / \mu\text{s}$ |
|----------------|---------------------|
| 4              | >0.383              |
| 8              | >0.150              |
| 10             | >0.098              |
| 12             | >0.087              |
| 13             | >0.105              |



**Table S7.** Summary of fitting parameters of  $\text{TMA}_2[\text{KCo}_{0.995}\text{Fe}_{0.005}(\text{CN})_6]$  for inversion recovery

| $T / \text{K}$ | $T_1 / \mu\text{s}$ |
|----------------|---------------------|
| 3.7            | 4393.7              |
| 6              | 36.1                |
| 8              | 6.5                 |
| 10             | 1.8                 |
| 12             | 0.56                |

**Table S8.** Summary of fitting parameters of  $\text{TMA}_2[\text{KCo}_{0.995}\text{Fe}_{0.005}(\text{CN})_6]$  for Hahn echo-decay

| $T / \text{K}$ | $T_2 / \mu\text{s}$ | Slope/ $\mu\text{s}^{-1}$ |
|----------------|---------------------|---------------------------|
| 3.7            | 0.5                 | -4.0                      |
| 6              | 0.5                 | -4.0                      |
| 8              | 0.48                | -4.2                      |
| 10             | 0.44                | -4.5                      |
| 12             | 0.31                | -6.5                      |

**Table S9.** Summary of fitting parameters of  $\text{TMA}_2[\text{KCo}_{0.999}\text{Fe}_{0.001}(\text{CN})_6]$  for inversion recovery

| $T / \text{K}$ | $T_1 / \mu\text{s}$ |
|----------------|---------------------|
| 3.5            | 3268                |
| 6.5            | 54.9                |
| 8.1            | 10.3                |
| 10.2           | 1.8                 |
| 11.9           | 0.46                |
| 12.9           | 0.22                |

**Table S10.** Summary of fitting parameters of  $\text{TMA}_2[\text{KCo}_{0.999}\text{Fe}_{0.001}(\text{CN})_6]$  for Hahn echo-decay

| $T / \text{K}$ | $T_2 / \mu\text{s}$ | Slope/ $\mu\text{s}^{-1}$ |
|----------------|---------------------|---------------------------|
| 3.7            | 1.0                 | -2.0                      |
| 8.1            | 0.87                | -2.3                      |
| 10.1           | 0.65                | -3.1                      |
| 11.9           | 0.38                | -5.2                      |

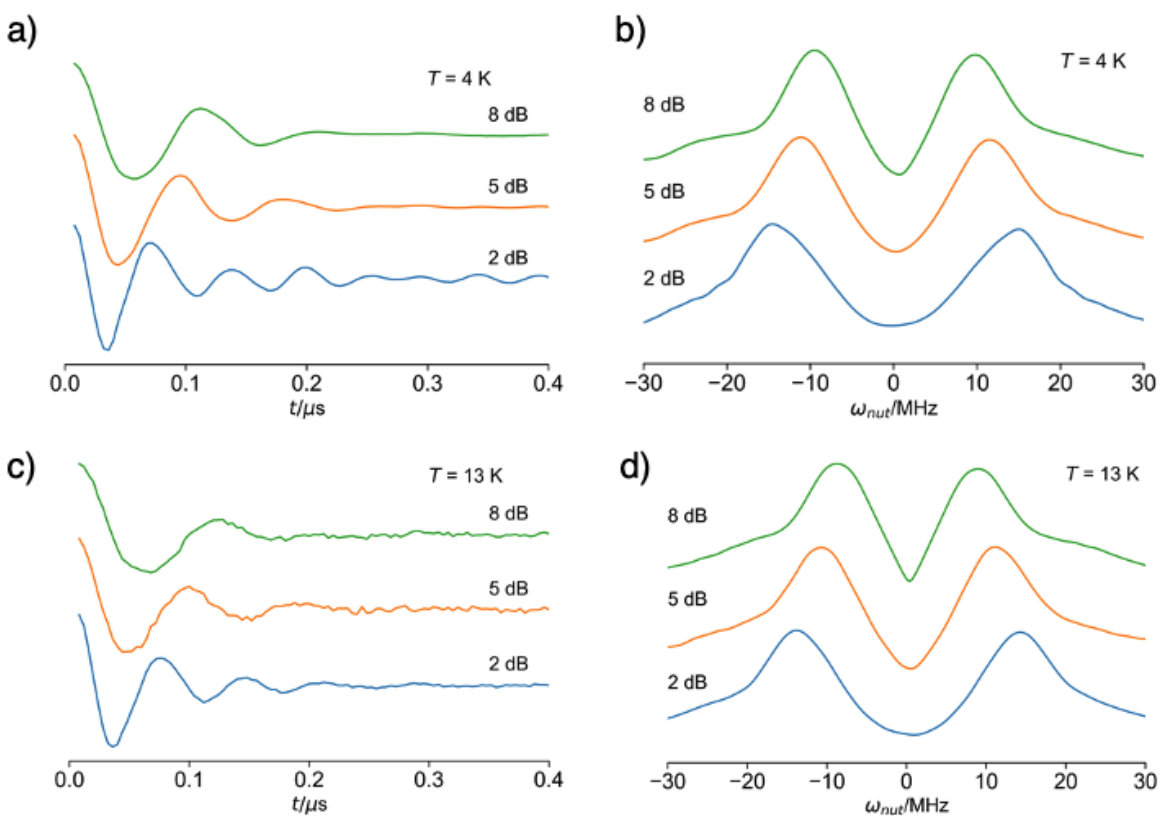

**Figure S15:** Transient Electron Spin Nutation of  $\text{TMA}_2[\text{KCo}_{0.98}\text{Fe}_{0.02}(\text{CN})_6]$  at 4 and 13 K.
